# Supplementary material for: Potentials of Mouthwashes in Disinfecting Cariogenic Bacteria and Biofilms Leading to Inhibition of Caries
Source: PubMed Central journal article supplement — Open Dent J. 2012 Jan 19;6:23–30. doi: 10.2174/1874210601206010023 (PMC3269010; doi:10.2174/1874210601206010023), 2012-01-19
Supplement: TODENTJ-6-23_SD1.pdf [file TODENTJ-6-23_SD1.pdf]

**Supplementary data.** Fluorescence photomicrography of *Streptococcus mutans* (*S. mutans*) and *Streptococcus sobrinus* (*S. sobrinus*) cells stained with BacLight bacterial viability kit. Live cells are visible as fluorescing green and dead cells visible as red after 10 seconds inoculation in different solutions (Phosphate Buffered Saline, chlorhexidine gluconate, benzethonium chloride, Listerine, and povidone-iodine).

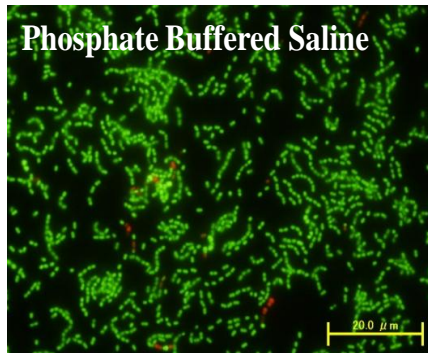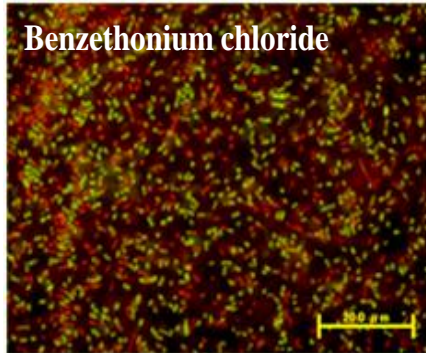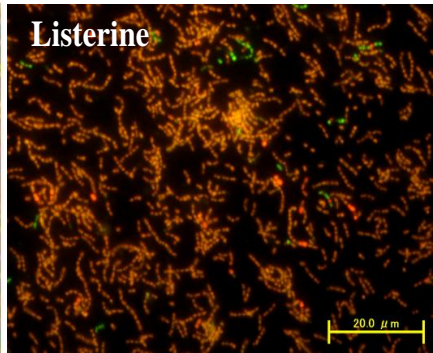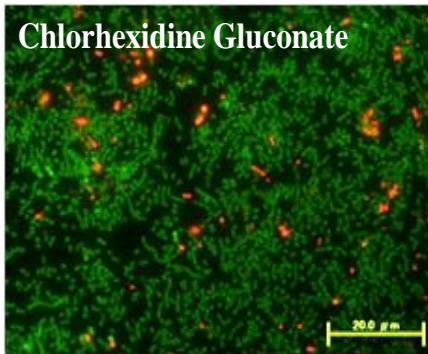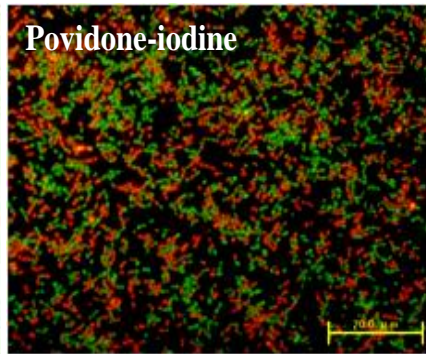

Supplementary data.

..... Oyanagi T. *et al.*
